# Supplementary material for: Dicyano-functionalized indium framework as a heterogeneous catalyst for CO2 fixation in the absence of solvent and co-catalyst
Source: Royal Society of Chemistry journal article supplement (doi:10.1039/d3ma00513e), 2023-01-01
Supplement: d3ma00513e1.pdf [file d3ma00513e1.pdf]

## Supporting Information

### **Dicyano-mediated indium framework as a heterogeneous catalyst followed by CO<sub>2</sub> fixation in the absence of solvent and co-catalyst**

Naghmeh Bayati, Saeed Dehghanpour\*

Department of Inorganic Chemistry, Faculty of Chemistry, Alzahra University, P. O. Box 1993891176, Tehran, Iran

\* Corresponding author.

E-mail address: [Dehghanpours@alzahra.ac.ir](mailto:Dehghanpours@alzahra.ac.ir) (S. Dehghanpour).

### **Experimental Section**

#### **Materials and characterization methods**

All chemicals were purchased from Sigma-Aldrich and Merck chemical Companies and used without further purification. The Powder X-ray diffraction (PXRD) patterns were recorded on a Seifert XRD 3003 PTS diffractometer equipped with Cu K $\alpha$ 1 radiation ( $k = 1.5406 \text{ \AA}$ ). FT-IR spectra were collected on a Bruker Tensor 27 FT-IR infrared spectrophotometer over the range of 400 – 4000  $\text{cm}^{-1}$  using the KBr pellets method. Scanning electron microscopy (SEM) images were observed on a Philips XL-30ESEM equipped with an X-ray energy dispersive detector. Thermo gravimetric analysis (TGA) was performed using a Mettler Toledo TGA/DSC instrument with a heating rate of 10°C/min in nitrogen atmosphere. XPS (X-ray photoemission spectroscopy) results were got with a Thermo Fischer Scientific K-Alpha instrument. Elemental analyses were recorded

on a Heraeus CHN-O-Rapid elemental analyzer. TPD profiles were performed with a Micrometrics, 2750 chemisorption analyzer. Nitrogen sorption isotherms were performed using a Belsorp Mini-II instrument at 77K. Carbon dioxide sorption isotherms were recorded on a Brunauer-Emmett-Teller (BET) surface area and pore size analyzer at 298K. The catalysis products were determined by GC and G-Mass using Agilent 6890 series with a FID detector, HP-5, 5% phenylmethylsiloxane capillary, and Agilent 5973 network, mass selective detector, HP-5 MS 6989 network GC system, respectively.

## Results

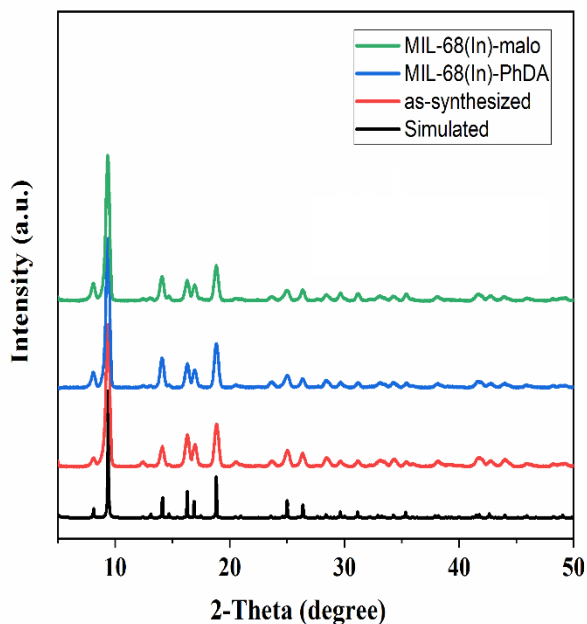

**Fig. S1.** Powder XRD patterns of all the synthesized catalysts.

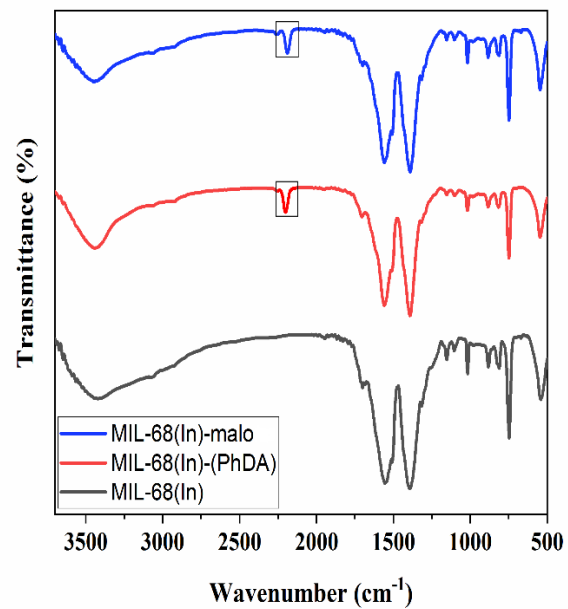

**Fig. S2.** FT-IR spectra of all the synthesized catalysts.

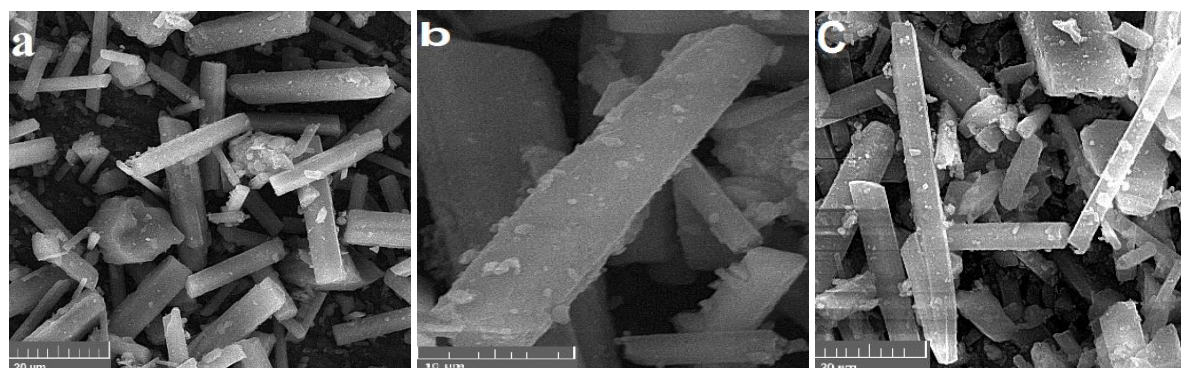

**Fig. S3.** SEM photographs of synthesized catalysts (a) Mil-68(In), (b) Mil-68(In)-PhDA, and (c) Mil-68(In)-malo

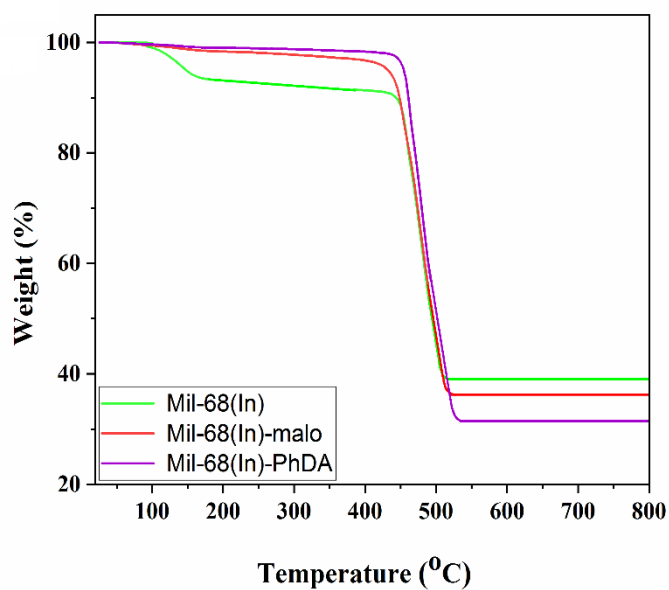

**Fig. S4.** TGA curves of Mil-68(In), Mil-68(In)-malo, and Mil-68(In)-PhDA

**Table S1.** Elemental analysis of MIL-68(In) and cyano functionalized MIL-68(In)

| Entry | Catalyst         | C<br>(wt. %) | H<br>(wt. %) | N<br>(wt. %) | Amount of catalysts loading<br>(wt. %) |
|-------|------------------|--------------|--------------|--------------|----------------------------------------|
| 1     | MIL-68(In)-Calcd | 33.37        | 1.32         | 0.76         | —                                      |
| 2     | MIL-68(In)-Found | 33.34        | 1.30         | 0.75         | —                                      |
| 3     | MIL-68(In)-PhDA  | 36.31        | 2.18         | 4.05         | 22.59                                  |
| 4     | MIL-68(In)-malo  | 34.52        | 3.29         | 3.77         | 8.89                                   |

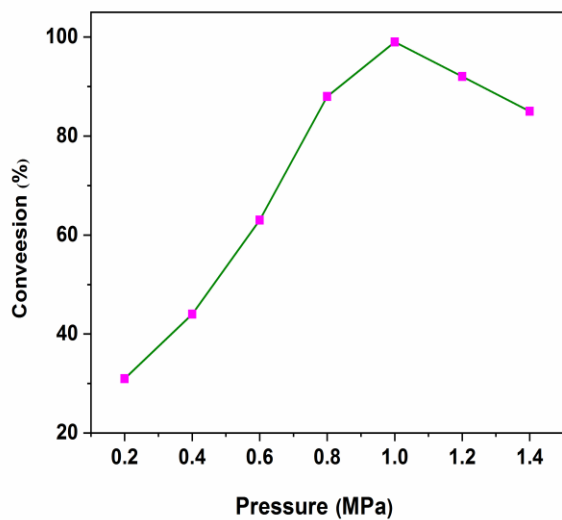

**Fig. S5.** Effect of CO<sub>2</sub> pressure on the cycloaddition of ECH over Mil-68(In)-PhDA catalyst.

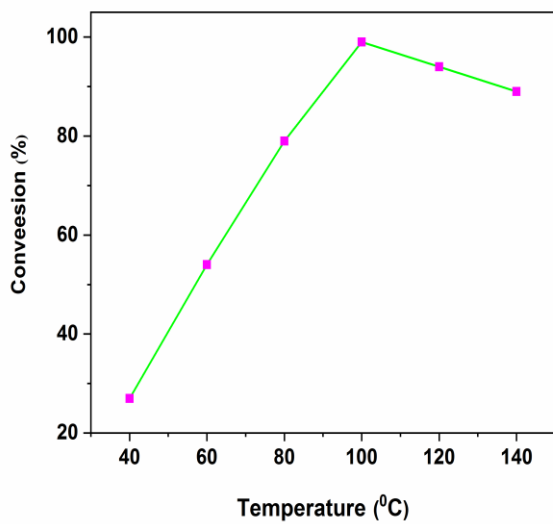

**Fig. S6.** Effect of temperature on the cycloaddition of ECH over Mil-68(In)-PhDA catalyst.

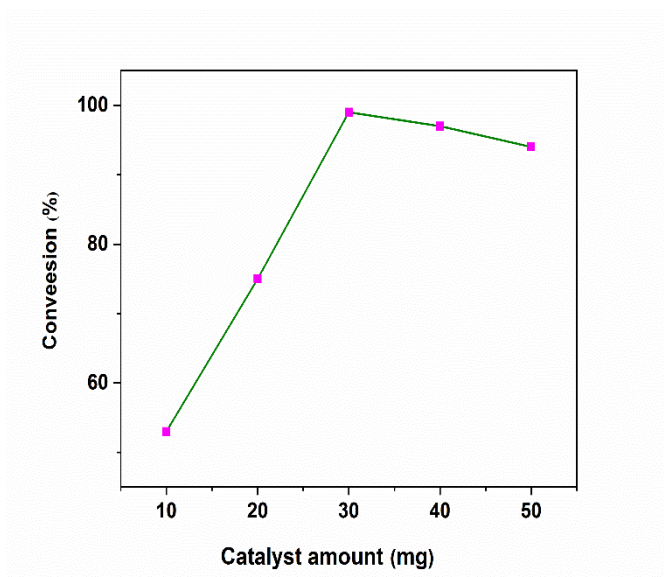

**Fig. S7.** Effect of catalyst amount on the cycloaddition of ECH over Mil-68(In)-PhDA catalyst.

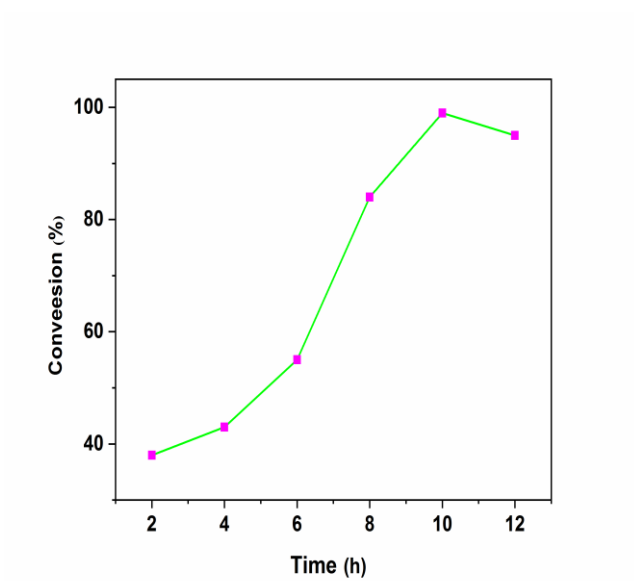

**Fig. S8.** Effect of reaction time on the cycloaddition of ECH over Mil-68(In)-PhDA catalyst

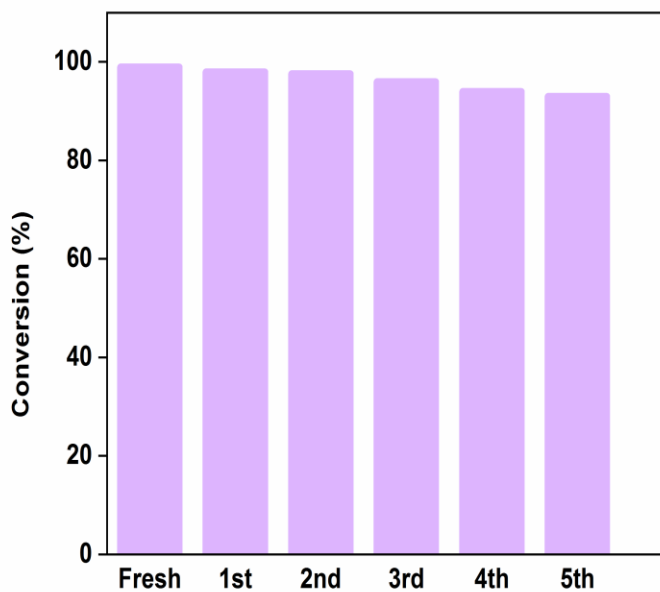

**Fig. S9.** Reusability test of Mil-68(In)-PhDA catalyst on the cycloaddition of ECH.

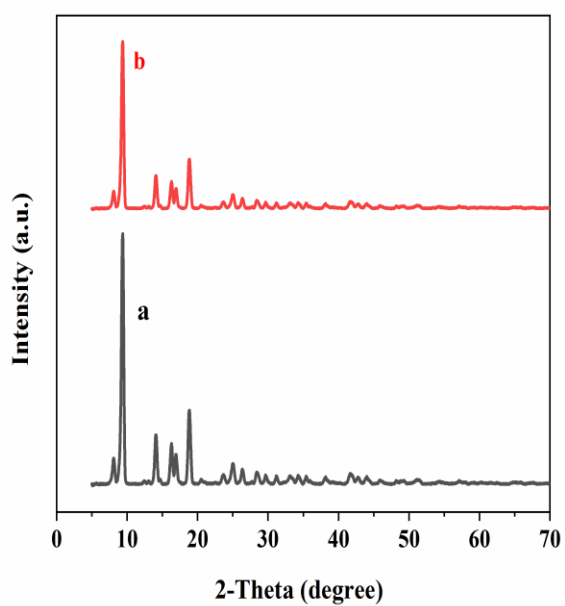

**Fig. S10.** XRD patterns of Mil-68(In)-PhDA (a) fresh and (b) after using 5 cycles.

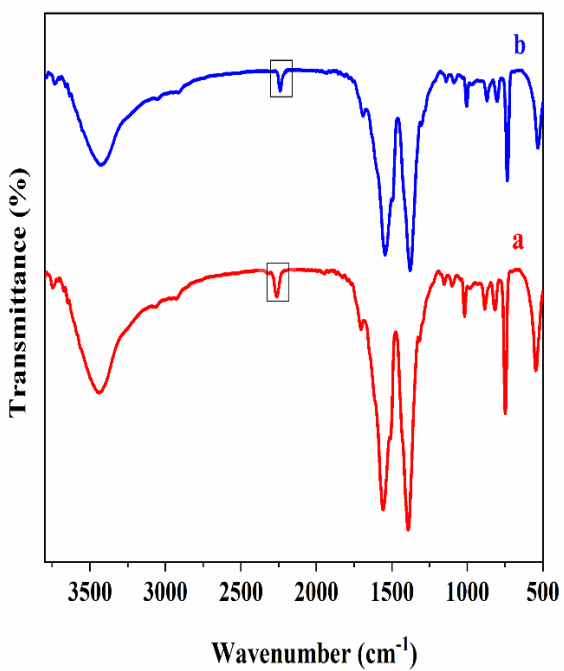

**Fig. S11.** FT-IR spectra of Mil-68(In)-PhDA (a) fresh and (b) after using 5 cycles.

**Table S2.** Textural Properties of MIL-68(In)-PhDA after catalytic cycles

| Number of catalytic cycles | S <sub>BET</sub> (m <sup>2</sup> . g <sup>-1</sup> ) |
|----------------------------|------------------------------------------------------|
| 1                          | 623                                                  |
| 2                          | 619                                                  |
| 3                          | 616                                                  |
| 4                          | 609                                                  |
| 5                          | 597                                                  |
